# Supplementary material for: Risk-taking behavior, the second-to-fourth digit ratio and psychological features in a sample of cavers
Source: PeerJ. 2019 Nov 8;7:e8029. doi: 10.7717/peerj.8029 (PMC6844240; doi:10.7717/peerj.8029)
Supplement: Data S1 [file peerj-07-8029-s001.xlsx]

## Sheet: BFQ-2
Subjects	BIG 5 Factors							Subjects	BIG 5 Subdimensions
	ENERGY	FRIENDLINESS	CONSCIENTIOUSNESS	EMOTIONAL STABILITY	OPENNESS	LIE SCALE			ENERGY		FRIENDLINESS		CONSCIENTIOUSNESS		EMOTIONAL STABILITY		OPENNESS		LIE SCALE
									Dynamism	Dominance	Cooperativeness	Politeness	Scrupulousness	Perseverance	Emotion control	Impulse control	Openness to culture	Openness to experience	Lie egoistic	Lie moralistic
M01	39	64	56	62	59	67		M01	44	38	55	58	52	59	54	69	58	58	60	68
M02	46	67	61	52	75	64		M02	49	45	69	62	64	53	42	61	72	72	60	64
F01	52	64	54	52	60	43		F01	59	46	63	63	54	53	54	50	55	62	47	42
M03	44	43	55	51	58	51		M03	58	34	48	40	55	55	54	48	54	61	46	56
F02	57	64	57	59	69	55		F02	66	47	63	63	54	58	56	60	67	67	54	55
M04	39	43	55	48	57	52		M04	41	41	48	40	59	50	47	50	59	53	50	54
M05	60	45	68	46	64	64		M05	64	54	50	42	68	64	50	43	59	67	68	58
M06	57	51	49	69	56	67		M06	58	55	54	50	46	53	67	67	58	53	65	64
M07	68	70	73	45	69	60		M07	71	61	69	69	74	67	42	50	67	67	53	64
M08	65	58	64	68	59	72		M08	63	64	57	58	56	68	70	62	55	62	70	68
F03	38	54	45	52	50	47		F03	39	42	53	56	45	48	44	61	51	50	42	53
F04	61	54	59	57	65	61		F04	63	56	53	56	51	65	60	52	55	71	61	59
F05	60	67	71	66	65	61		F05	63	55	71	61	68	69	65	64	66	61	71	50
M09	71	45	58	45	73	48		M09	63	74	50	42	40	75	54	38	70	71	65	34
M10	49	58	66	62	71	47		M10	44	54	59	58	72	55	61	62	72	65	50	45
M11	57	58	59	65	69	55		M11	53	60	62	54	63	51	65	62	70	64	58	51
M12	45	63	40	70	62	61		M12	53	39	70	54	42	42	62	74	56	65	55	64
F06	51	58	73	58	57	62		F06	50	52	63	52	71	69	58	57	55	57	56	65
M13	59	49	52	45	70	53		M13	50	65	62	37	55	50	46	46	68	67	58	49
F07	47	55	59	52	62	65		F07	63	35	60	50	54	62	54	50	54	68	56	70
M14	51	43	43	49	50	57		M14	48	53	44	44	39	50	48	52	48	52	54	59
F08	39	44	38	47	53	43		F08	49	34	40	50	34	45	45	50	50	56	48	41
F09	31	44	56	65	54	52		F09	32	36	46	44	60	50	64	63	54	54	56	48
F10	51	53	50	32	55	51		F10	56	46	55	52	53	48	28	42	58	52	42	59
M15	52	44	51	31	55	48		M15	49	55	43	46	42	61	43	25	54	55	60	39
F11	45	65	46	75	60	56		F11	55	39	67	61	48	47	71	73	66	53	61	50
F12	58	48	53	54	58	59		F12	55	59	53	45	51	54	53	56	67	49	56	59
F13	53	59	50	53	67	48		F13	63	45	58	59	40	61	50	56	63	68	54	44
M16	49	46	52	56	66	38		M16	55	44	52	42	42	64	59	51	62	67	55	43
M17	63	64	66	49	59	43		M17	63	60	69	45	62	67	54	44	56	59	48	41
F14	52	54	66	73	62	62		F14	63	43	58	50	63	64	75	65	64	58	59	63
M18	41	43	47	53	80	41		M18	47	38	48	40	52	44	51	54	50	45	38	47
F15	36	53	55	51	57	48		F15	44	35	49	57	53	56	51	52	61	53	47	50
F16	55	66	55	43	58	59		F16	66	45	65	64	54	54	50	37	55	60	59	57

## Sheet: RTI
Subjects	Risk Taking Inventory
	DRT	PB
M01	5	19
M02	7	12
F01	7	18
M03	4	15
F02	7	14
M04	6	18
M05	4	20
M06	4	13
M07	5	20
M08	6	17
F03	6	14
F04	6	12
F05	10	17
M09	7	11
M10	12	17
M11	9	15
M12	13	16
F06	6	18
M13	9	17
F07	6	18
M14	13	5
F08	5	20
F09	3	20
F10	4	16
M15	12	16
F11	6	20
F12	9	16
F13	7	13
M16	8	17
M17	7	16
F14	3	20
M18	9	15
F15	7	18
F16	8	18

## Sheet: 2D4D
Subjects	2D:4D
M01	1.01754
M02	0.935897
F01	0.984615
M03	0.935897
F02	0.929825
M04	1
M05	1.01786
M06	0.944814
M07	1.03448
M08	0.960526
F03	0.929577
F04	0.935897
F05	1
M09	0.972603
M10	0.970194
M11	0.893939
M12	0.864865
F06	1
M13	0.872093
F07	1.04904
M14	0.893194
F08	1.03704
F09	0.983351
F10	0.945206
M15	0.950617
F11	1.06061
F12	0.944444
F13	0.929825
M16	0.969697
M17	0.958904
F14	1.08799
M18	0.951807
F15	1.01538
F16	1.01749

## Sheet: POMS
Subjects	POMS FACTORS
	T	D	A	V	F	C	TMD
M01	41	45	43	59	50	52	172
M02	39	44	41	53	43	45	159
F01	54	44	68	56	66	56	232
M03	46	42	44	53	48	50	177
F02	39	42	43	60	41	48	153
M04	44	42	45	49	43	43	168
M05	46	43	44	69	41	45	150
M06	41	43	44	64	41	41	146
M07	47	42	44	68	43	54	162
M08	41	41	40	69	39	50	142
F03	39	41	40	49	41	43	155
F04	43	46	45	55	39	45	163
F05	56	55	51	53	50	37	196
M09	39	43	44	54	48	45	165
M10	44	44	43	61	50	56	176
M11	39	41	40	58	41	45	148
M12	49	53	58	58	59	52	213
F06	46	43	45	66	37	50	155
M13	39	41	43	61	43	39	144
F07	41	45	49	61	41	48	163
M14	41	59	45	64	46	59	186
F08	44	63	67	39	70	43	248
F09	44	42	41	49	48	50	176
F10	46	44	53	53	48	59	197
M15	51	47	60	56	50	45	197
F11	41	41	40	65	46	41	144
F12	39	43	41	58	39	48	152
F13	47	49	51	51	54	54	204
M16	43	44	51	61	52	43	172
M17	43	44	47	58	52	43	171
F14	39	41	43	63	46	39	145
M18	51	54	53	65	48	61	202
F15	46	45	41	44	48	45	181
F16	41	42	44	60	41	43	151

## Sheet: STAI-Y
Subjects	STAI-Y
	STATE	TRAIT
M01	40	52
M02	56	50
F01	47	49
M03	53	51
F02	44	48
M04	42	45
M05	48	50
M06	44	43
M07	40	54
M08	48	40
F03	39	61
F04	48	49
F05	63	40
M09	54	54
M10	38	48
M11	49	47
M12	53	49
F06	39	47
M13	53	50
F07	48	48
M14	56	52
F08	51	58
F09	58	44
F10	50	69
M15	50	52
F11	43	39
F12	50	59
F13	48	39
M16	54	52
M17	46	49
F14	48	36
M18	53	55
F15	50	55
F16	47	46
